# Supplementary material for: Water, Energy, and Carbon with Artificial Neural Networks(WECANN): A statistically-based estimate of global surface turbulentfluxes using solar-induced fluorescence
Source: Copernicus journal article supplement (doi:10.5194/bg-2016-495), 2016-11-18
Supplement: Supplementary file 1 [file bg-2016-495-supplement.pdf]

# **Water, Energy, and Carbon with Artificial Neural Networks (WECANN): A statistically-based estimate of global surface turbulent fluxes using solar-induced fluorescence**

Seyed Hamed Alemohammad, Bin Fang, Alexandra G. Konings, Julia K. Green, Jana Kolassa, Catherine Prigent, Filipe Aires, Diego Miralles, Pierre Gentine

## **Supplementary Material**

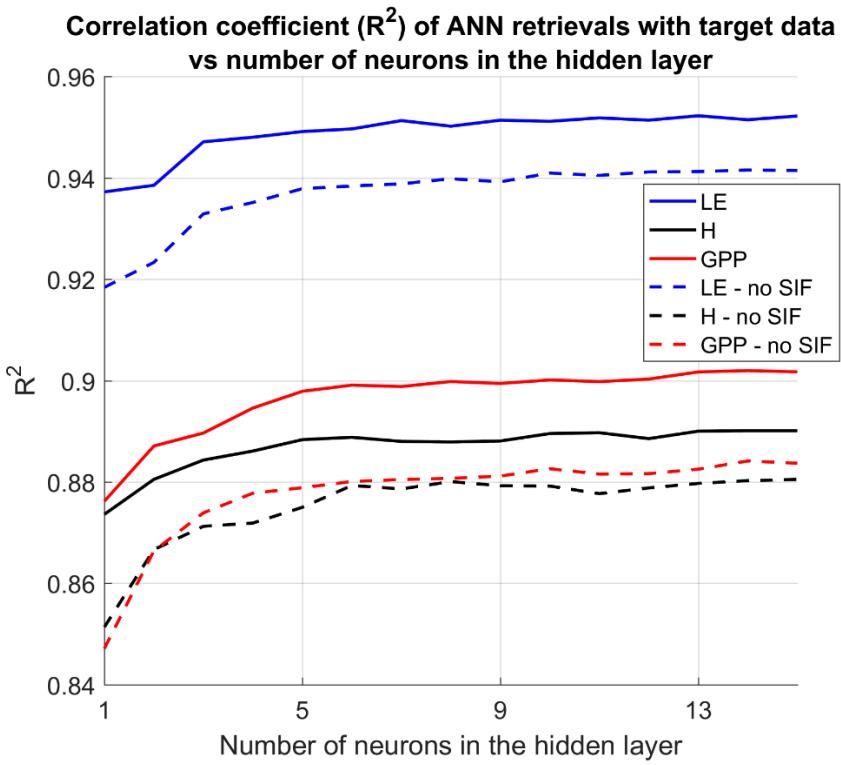

**Figure S1: Correlation coefficients ( $R^2$ ) between ANN retrievals of LE, H, and GPP and target data as a function of number of neurons in hidden layer. Solid lines show  $R^2$  for retrievals that include SIF as an input in ANN, and dashed lines show  $R^2$  for retrievals without SIF as an input.**

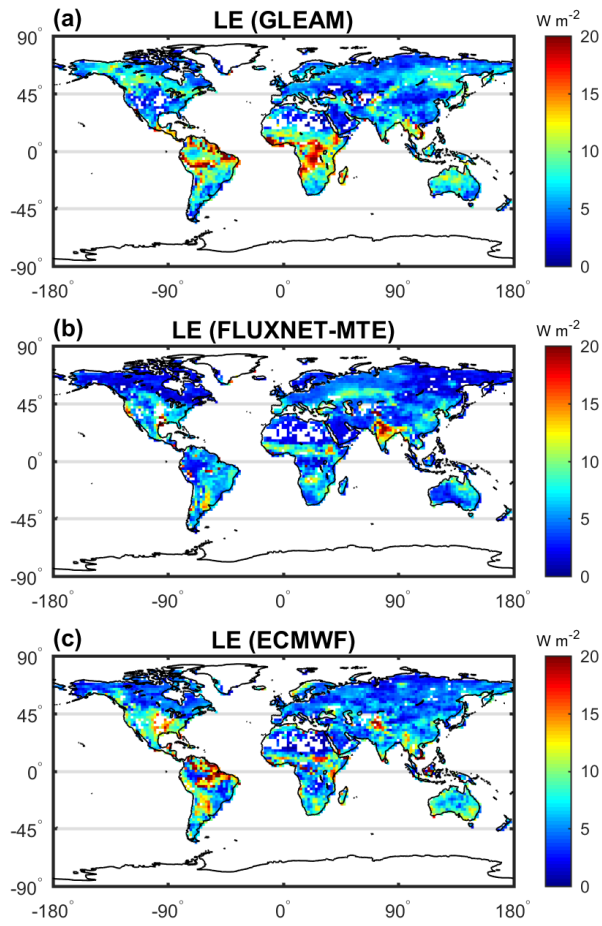

Figure S2: RMSE of LE for each of the three training datasets estimated by Triple Collocation (2008-2010).

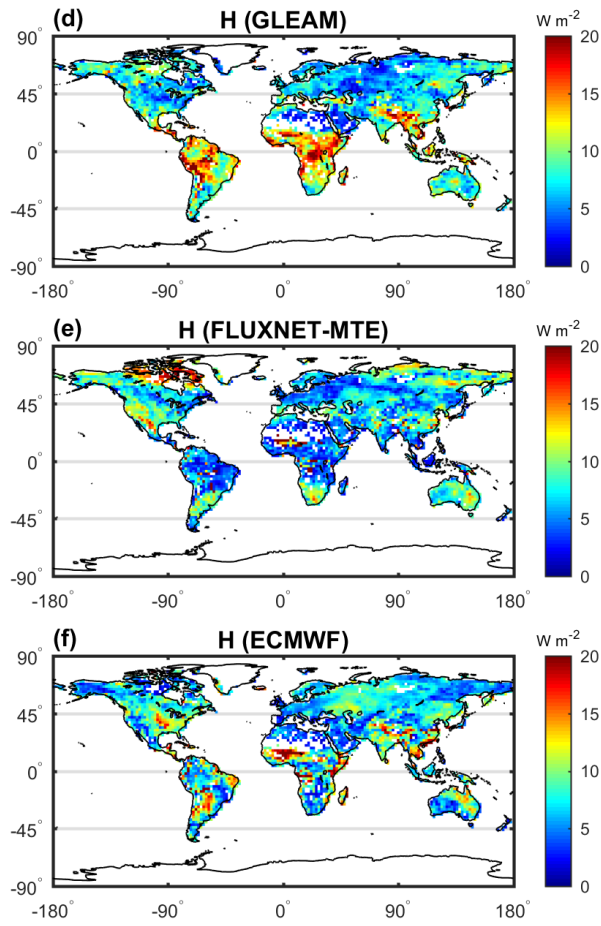

Figure S3: Similar to Figure S1 for H.

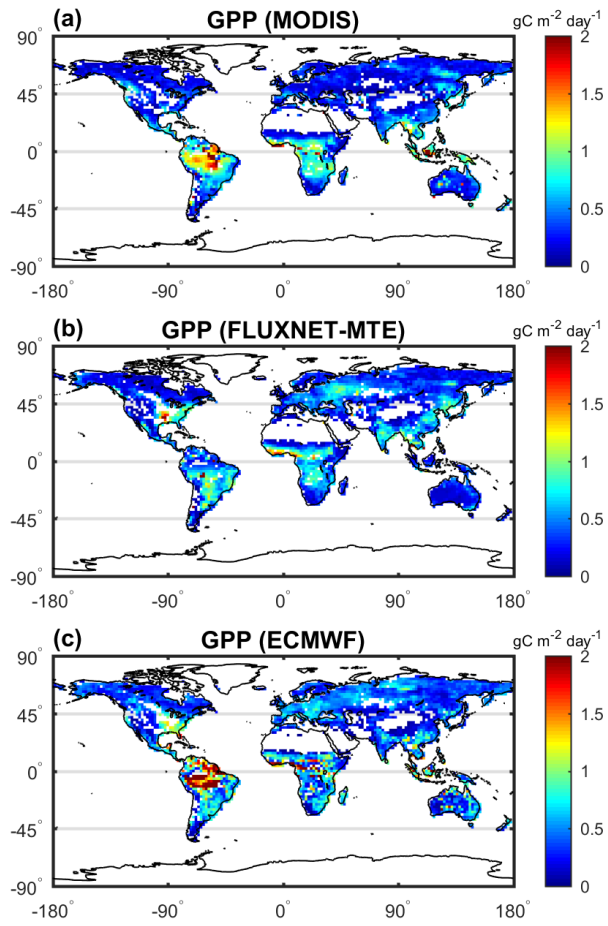

Figure S4: Similar to Figure S1 for GPP.
